# Supplementary material for: A ratiometric fluorescence method based on silver nanoclusters for sensitive detection of β-galactosidase activity
Source: Royal Society of Chemistry journal article supplement (doi:10.1039/d5nj00793c), 2025-01-01
Supplement: d5nj00793c1.pdf [file d5nj00793c1.pdf]

## Supporting Information

### **Ratiometric fluorescence method based on silver nanoclusters for sensitive detection of $\beta$ -galactosidase activity**

Sisi Zhang <sup>a,#</sup>, Weiping Liu <sup>b,#</sup>, Sikai Wang <sup>a</sup>, Lei Wang <sup>a</sup>, Lin Lv <sup>a</sup>, Yan Zhao <sup>a,c,d \*</sup>

<sup>a</sup> School of Science, Xihua University, Chengdu, 610039, China

<sup>b</sup> Department of Clinical Laboratory, Zigong First People's Hospital, Zigong 643000, Sichuan, China

<sup>c</sup> Asymmetric Synthesis and Chiral Technology Key Laboratory of Sichuan Province, Xihua University, Chengdu 610039, China

<sup>d</sup> Sichuan Engineering Research Center for Molecular Targeted Diagnostic & Therapeutic Drugs, Xihua University, Chengdu 610039, China

<sup>#</sup> Sisi Zhang and Weiping Liu contributed equally to this work.

\*Corresponding authors:

Dr. Yan Zhao, Email address: zhao518yan@163.com

**Table S1.** Comparison of methods for the determinations of  $\beta$ -Gal activity

| Method      | Probe material     | Linear range<br>(U/L) | Detection<br>limit<br>(U/L) | Reference |
|-------------|--------------------|-----------------------|-----------------------------|-----------|
| Colorimetry | Au-Pt NCs          | 15-55                 | 5.2                         | S1        |
| Fluorimetry |                    | 2.5-25                | 1.2                         |           |
| Fluorometry | Si NPs             | 2-120                 | 1.36                        | S2        |
| Colorimetry |                    | 6-120                 | 1.07                        |           |
| Fluorimetry | NIR probe (TMG)    | 0-200                 | 0.86                        | S3        |
| Fluorimetry | BPQDs              | 0-200                 | 0.76                        | S4        |
| Fluorimetry | $\beta$ -CD-CQDs   | 1.9-70                | 0.6                         | S5        |
| Fluorimetry | Copper nanocluster | 3.3-91.8              | 0.45                        | S6        |
| Fluorimetry | HBT-Gal            | 0-25000               | 0.19                        | S7        |
| Fluorimetry | AgNCs              | 0.2-50                | 0.031                       | This work |

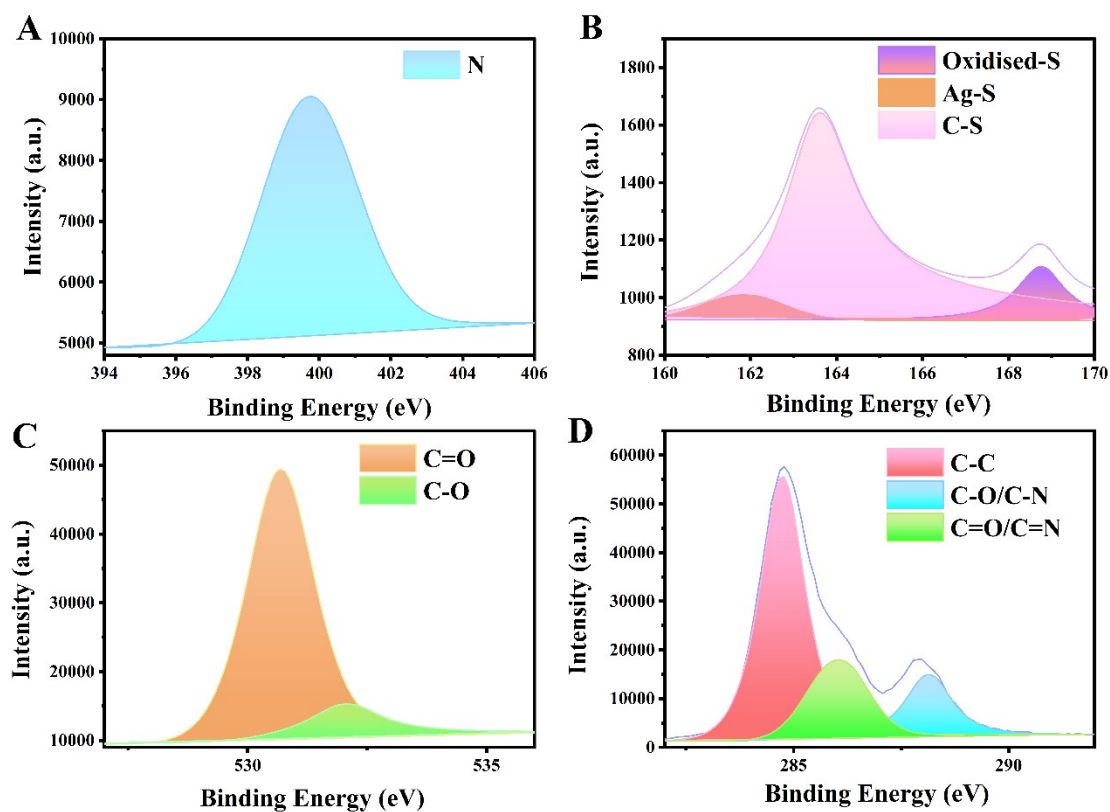

**Fig. S1.** High-resolution XPS spectra of (A) N 1s, (B) S 2p, (C) O 1s, and (D) C 1s of AgNCs.

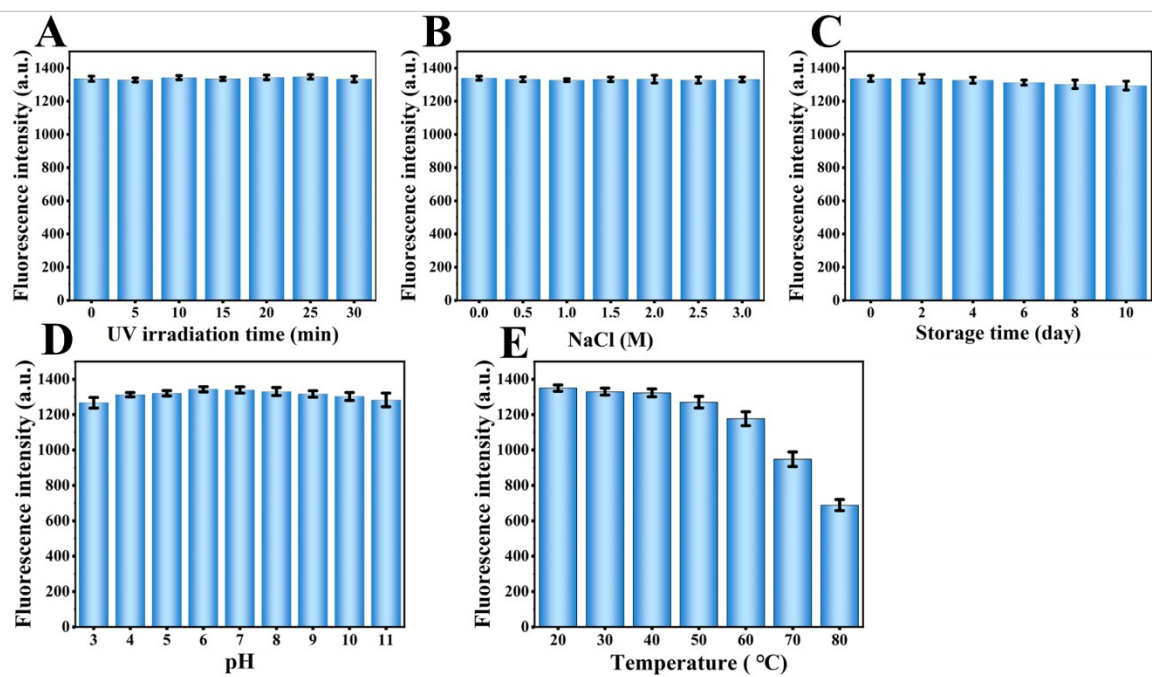

**Fig. S2.** Influence of (A) UV irradiation time, (B) ionic strength, (C) storage time, (D) pH, and (E) temperature on the fluorescence intensity of AgNCs.

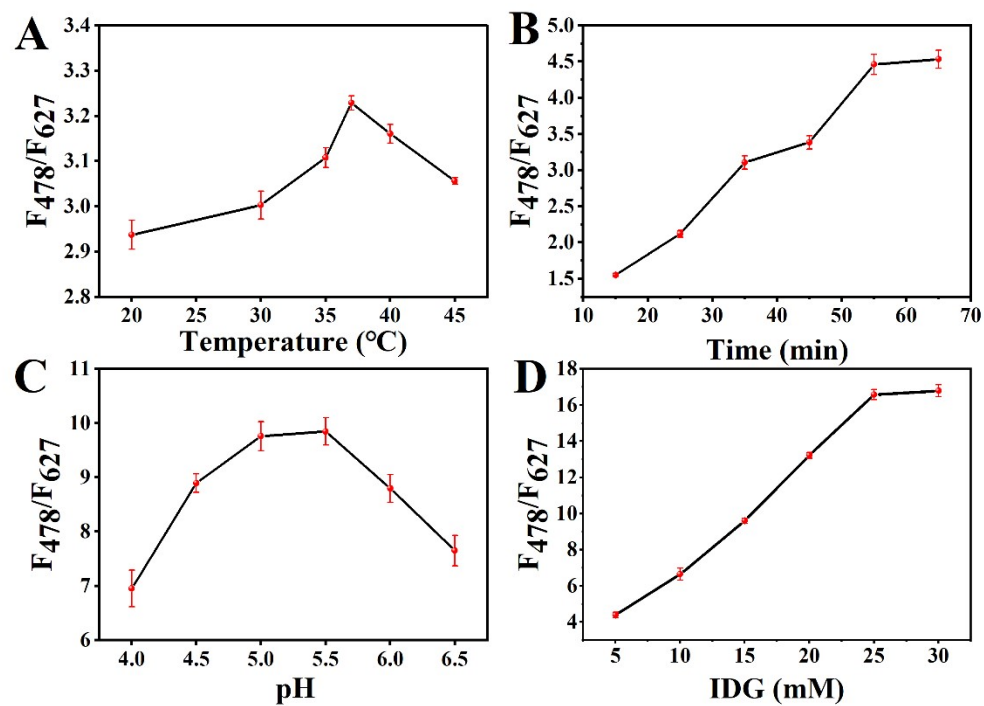

**Fig. S3.** Influence of (A) reaction temperature, (B) reaction time, (C) reaction pH, and (D) concentration of IDG on the fluorescence intensity ratio of  $F_{478}/F_{627}$ .

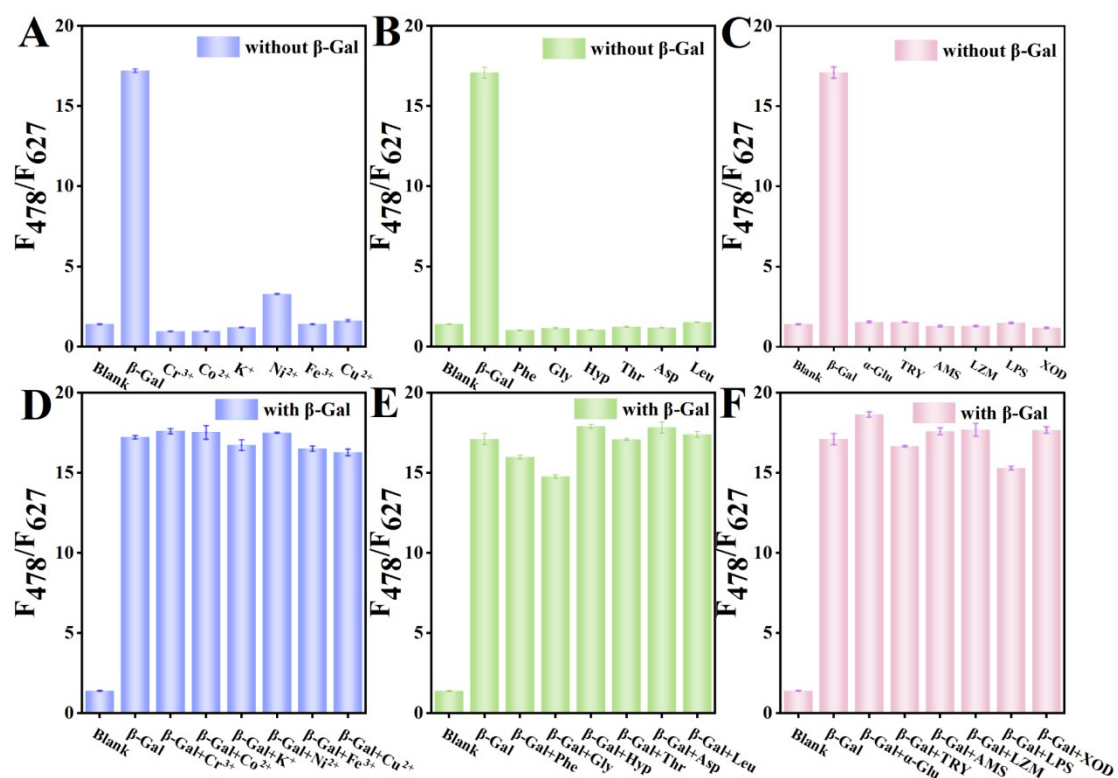

**Fig. S4.** (A-C) Selectivity of AgNCs/IDG system and (D-F) anti-interference of AgNCs/ $\beta$ -Gal/IDG system for  $\beta$ -Gal activity analysis, respectively. The concentrations of metal ions, amino acids, and biomolecules were 0.01 M, 10 mg/mL, and 10 U/mL, respectively.

## References

- S1 H. Sun, Y. Lv, J. Zhang, C. Zhou and X. Su, A dual-signal fluorometric and colorimetric sensing platform based on gold-platinum bimetallic nanoclusters for the determination of  $\beta$ -galactosidase activity, *Anal. Chim. Acta*, 2023, **1252** 341010, DOI: 10.1016/j.aca.2023.341010.
- S2 J. Liu, Z. Li, J. Zhang, G. Wang and X. Su, A dual-signal fluorometric-colorimetric sensing platform and visual detection with a smartphone for the determination of  $\beta$ -galactosidase activity based on fluorescence silicon nanoparticles, *Talanta*, 2022, **240**, 123165, DOI: 10.1016/j.talanta.2021.123165.
- S3 X. Zhang, X. Chen, Y. Zhang, K. Liu, H. Shen, E. Zheng, X. Huang, S. Hou and X. Ma, A near-infrared fluorescent probe for the ratiometric detection and living cell imaging of  $\beta$ -galactosidase, *Anal. Bioanal. Chem.*, 2019, **411**, 7957-7966, DOI: 10.1007/s00216-019-02181-7.
- S4 D. Li, L. Liang, Y. Tang, L. Fu, S. Xiao and Q. Yuan, Direct and single-step sensing of primary ovarian cancers related glycosidases, *Chinese Chem. Lett.*, 2019, **30**, 1013-1016, DOI: 10.1016/j.cclet.2018.12.022.
- S5 C. Tang, J. Zhou, Z. Qian, Y. Ma, Y. Huang and H. Feng, A universal fluorometric assay strategy for glycosidases based on functional carbon quantum dots:  $\beta$ -galactosidase activity detection in vitro and in living cells, *J. Mater. Chem. B*, 2017, **5**, 1971-1979, DOI: 10.1039/c6tb03361j.
- S6 Y. Chang, J. Wang, H. Guo, W. Yao, H. Xie, L. Li and X. Liu, Temperature-dependent luminescent copper nanoclusters with noncovalent interactions for

determination of  $\beta$ -galactosidase activity, *Microchim. Acta*, 2024, **191**, 768, DOI: 10.1007/s00604-024-06844-w.

- S7 D. Liu, Z. Zhang, A. Chen and P. Zhang, A turn on fluorescent assay for real time determination of  $\beta$ -galactosidase and its application in living cell imaging, *Spectrochim. Acta A*, 2022, **265**, 120345, DOI: 10.1016/j.saa.2021.120345.
